# Supplementary material
Source: PubMed Central journal article supplement (PMC7614128)

## Figure 6

### Figure 6a

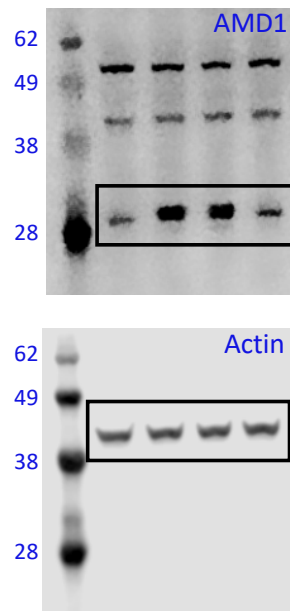

Supplement: EMS118338-supplement-Figure_6_uncropped_blots.pdf [file EMS118338-supplement-Figure_6_uncropped_blots.pdf]
